# Supplementary material
Source: PubMed Central journal article supplement (PMC3778956)

**Fig.S1**

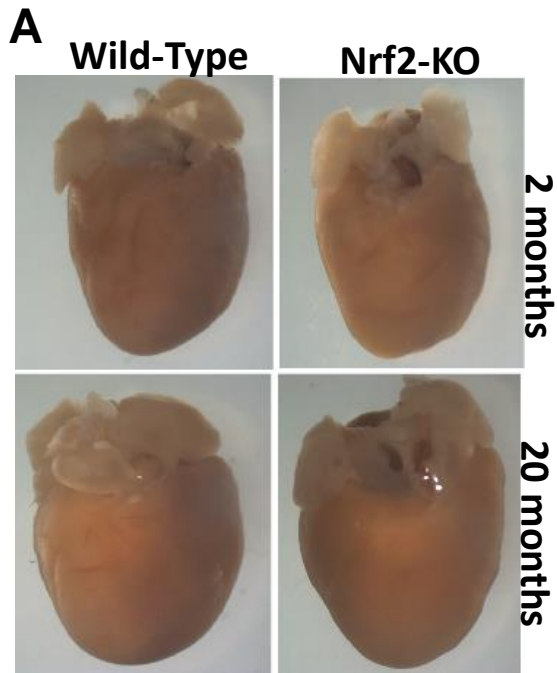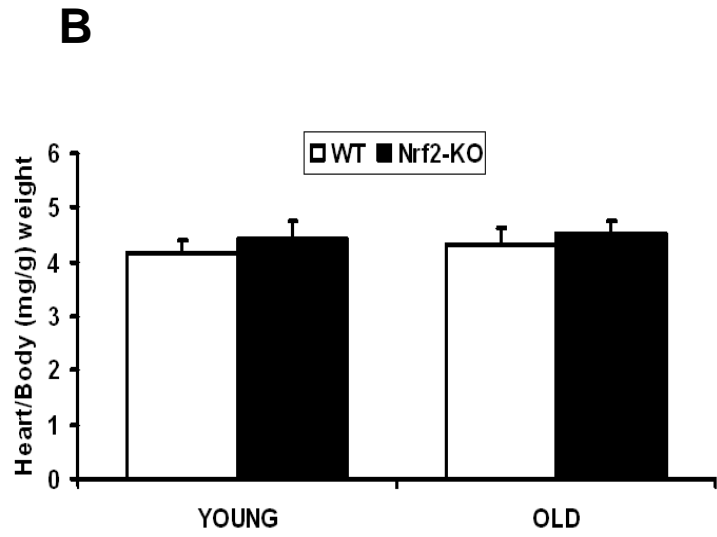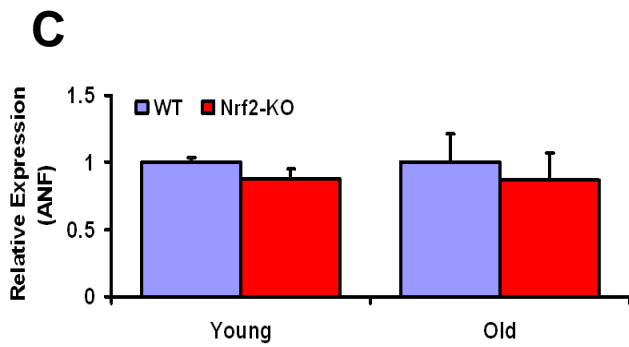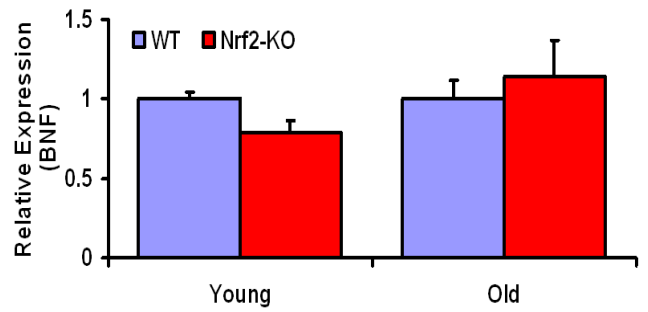

Supplement: supp_cvt150_cvt150supp_fig1.pdf [file supp_cvt150_cvt150supp_fig1.pdf]

Fig.S2

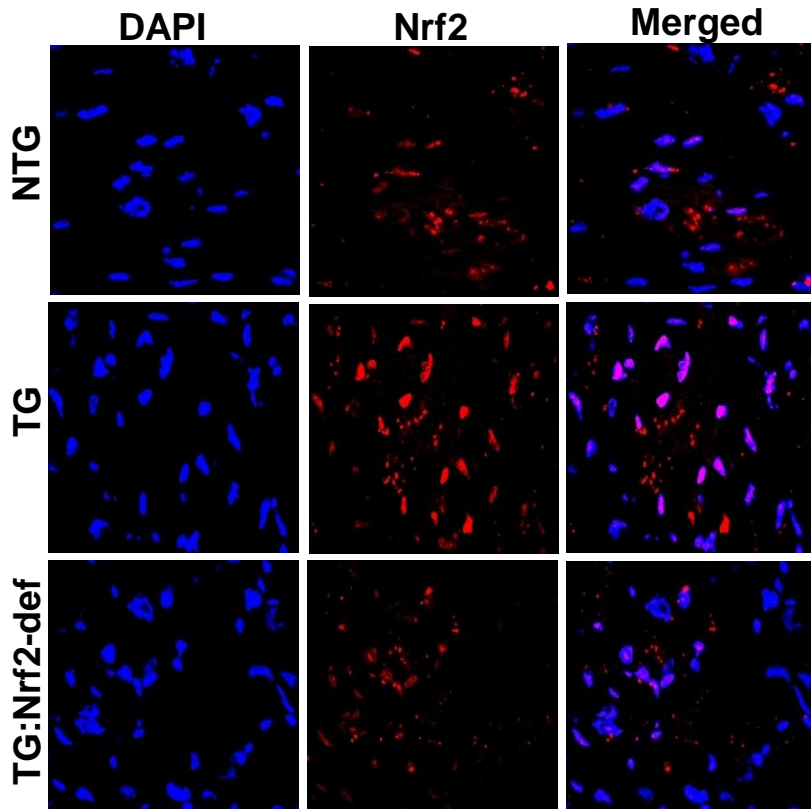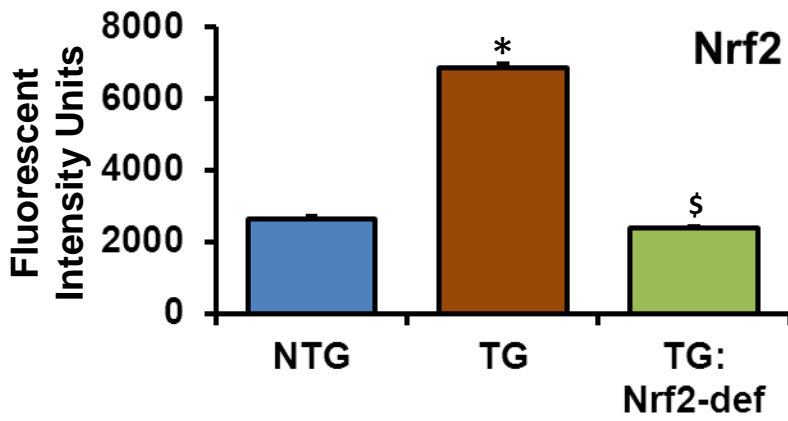

Supplement: supp_cvt150_cvt150supp_fig2.pdf [file supp_cvt150_cvt150supp_fig2.pdf]

Fig.S3

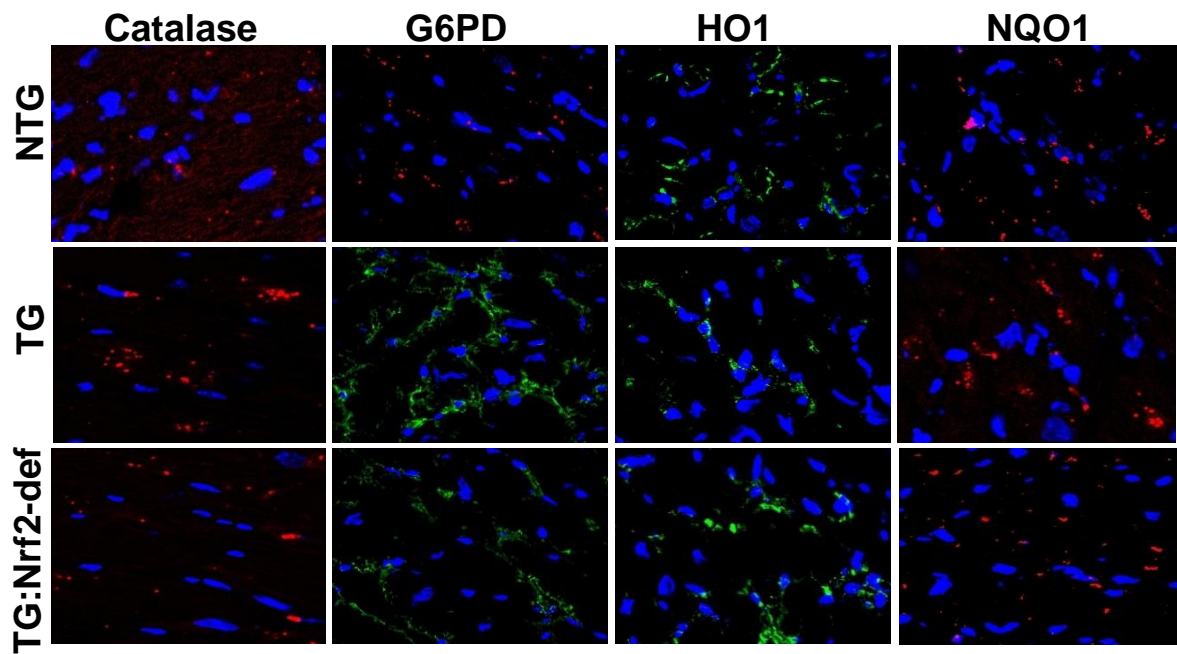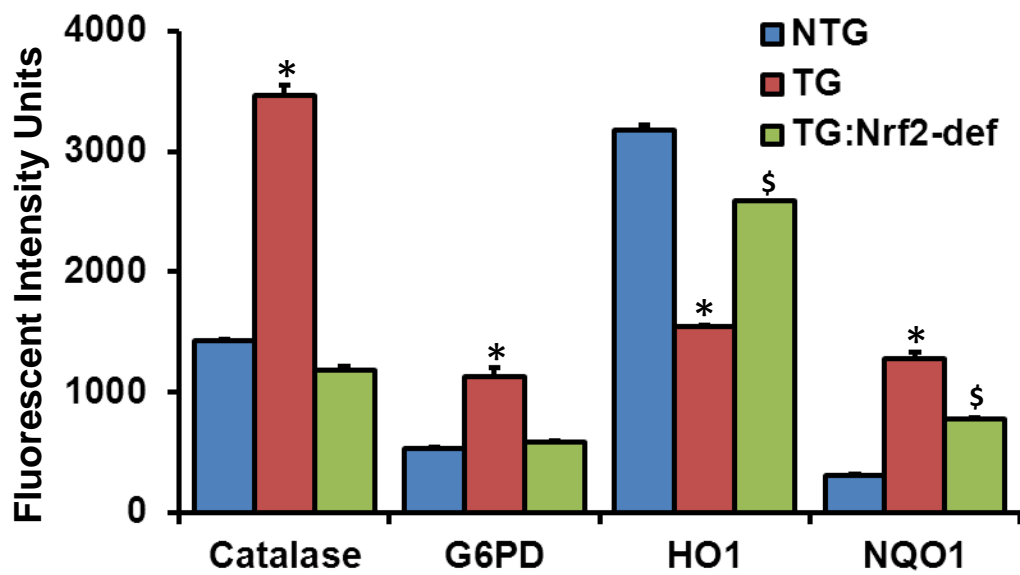

Supplement: supp_cvt150_cvt150supp_fig3.pdf [file supp_cvt150_cvt150supp_fig3.pdf]

**Fig. S4****A**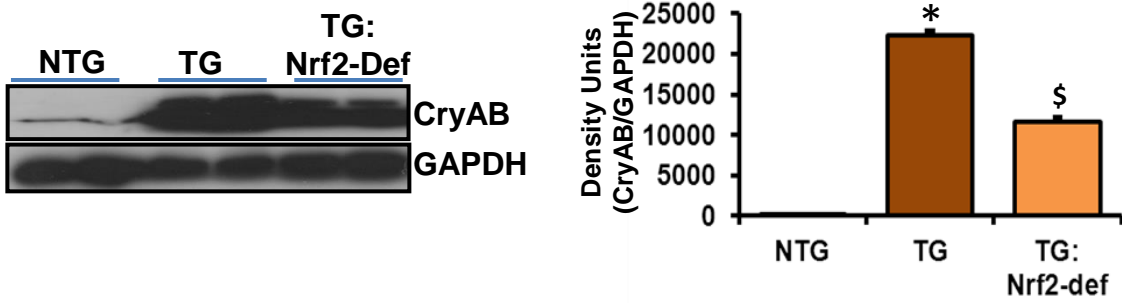**B**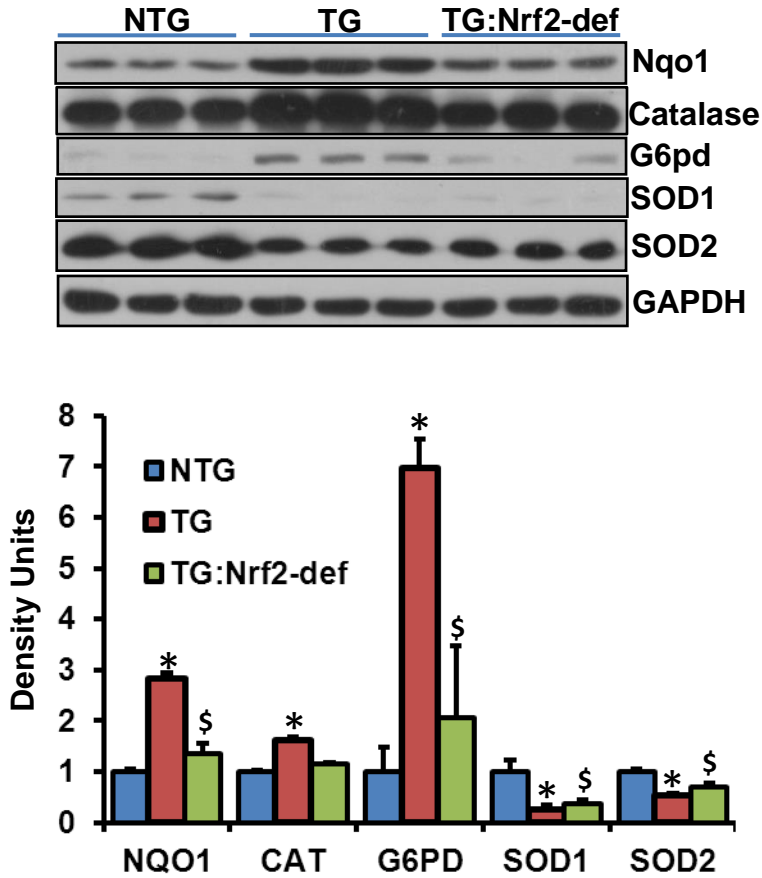**C**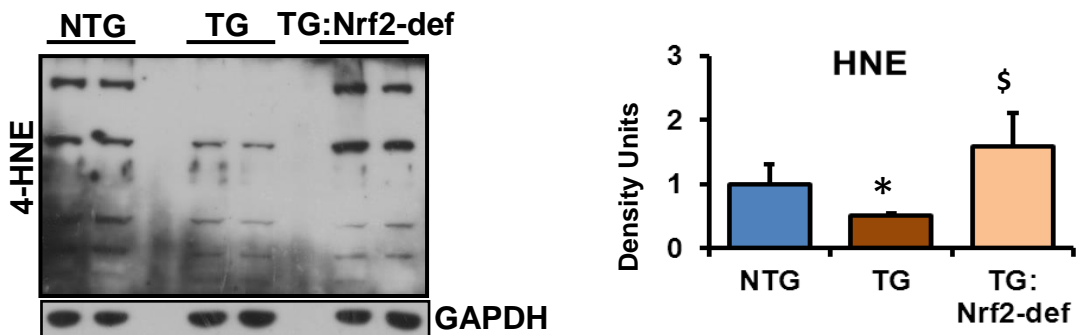

Supplement: supp_cvt150_cvt150supp_fig4.pdf [file supp_cvt150_cvt150supp_fig4.pdf]

**Fig. S5**

**A**

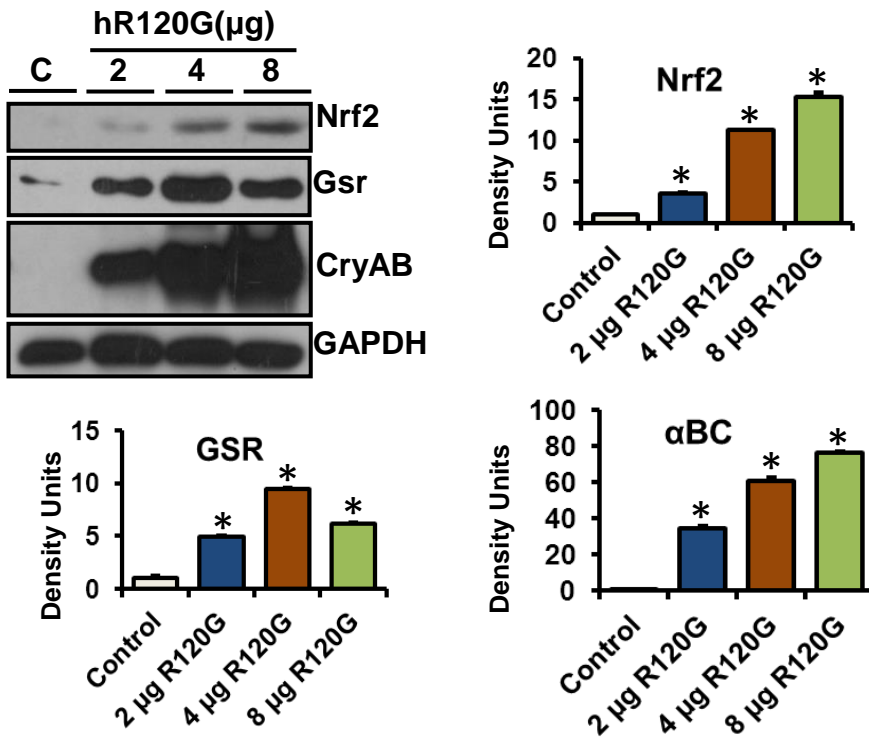

**B**

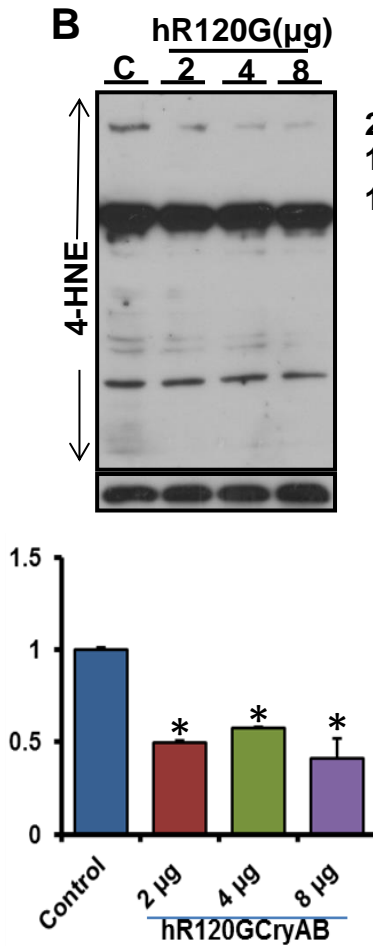

**C**

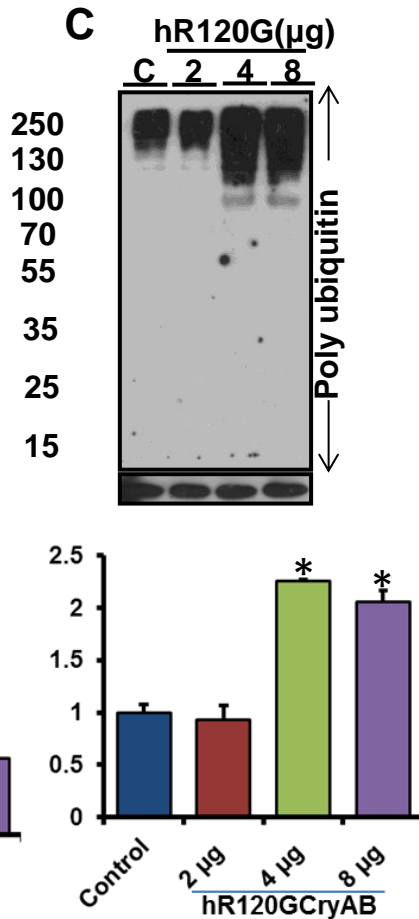

Supplement: supp_cvt150_cvt150supp_fig5.pdf [file supp_cvt150_cvt150supp_fig5.pdf]
